# Supplementary material
Source: Springer Nature journal article supplement (https://www.springermedizin.de/resource/supplementary/12889_2012_4966_MOESM1_ESM.pdf/9494094)
Supplement: MOESM1 [file 9494094]

**RECRUITMENT**

Recruitment letters, advertising & presentations at local community based seniors groups

Phone screening & plan home visit for eligible drivers

**BASELINE VISIT:** functional testing, questionnaires and device installation by mobile technician on next available date

Concealed randomization (n=380)

**INTERVENTION**

**CONTROL**

**INTERVENTION- 1st session**

**No active intervention**

**INTERVENTION- 2nd session**

**PROCESS EVALUATION:**  
Semi-structured interview

**12-month phone call** - questionnaires and uninstall black box

**12-month phone call** - questionnaires and uninstall black box
